# Supplementary material
Source: publisher site journal article supplement (https://www.dovepress.com/article/596901)
Supplement: Supplementary file 1 [file 596901%20Supplementary%20Table%201_1.docx]

**Supplementary table 1 Morphologic response after one course of induction therapy, stratified by ELN classification**

|  | VEN-HMA | HMA-LIIC | LIIC | *p* |
| --- | --- | --- | --- | --- |
| Response of favorable-risk patients after one course of induction therapy | | | | |
| CR | 4(44.4%) | 6(66.7%) | 4(30.8%) | 0.265 |
| CRi | 3(33.3%) | 1(11.1%) | 2(15.4%) | 0.611 |
| PR | 1(11.1%) | 0(0%) | 2(15.4%) | 0.766 |
| ORR | 8(88.8%) | 7(77.8%) | 8(61.6%) | 0.456 |
| Response of Intermediate-risk patients after one course of induction therapy | | | | |
| CR | 5(25%) | 2(11.8%) | 8(34.8%) | 0.440 |
| CRi | 9(45%) | 1(5.9%) | 2(8.7%) | 0.01 |
| PR | 4(20%) | 0(0%) | 3(13%) | 0.154 |
| ORR | 18(90%) | 3(17.7%) | 8(56.5%) | 0.01 |
| Response of high-risk patients after one course of induction therapy | | | | |
| CR | 4(25%) | 2(16.67%) | 5(29.41%) | 0.831 |
| CRi | 3(18.75%) | 2(16.67%) | 2(11.75%) | 0.881 |
| PR | 4(25%) | 1(8.33%) | 1(5.88%) | 0.253 |
| ORR | 11(68.75%) | 5(41.67%) | 8(47.06%) | 0.293 |

Abbreviations: VEN-HMA, Venetoclax combined with a hypomethylating agent; HMA-LIIC, hypomethylating agent plus low-intensity induction chemotherapy; LIIC, low-intensity induction chemotherapy alone; CR, complete remission; CRi, complete remission with incomplete hematologic recovery; PR, partial remission; ORR, overall response rate.
